# Supplementary material for: 16S rDNA Profiling to Reveal the Influence of Seed-Applied Biostimulants on the Rhizosphere of Young Maize Plants
Source: PubMed Central journal article supplement (PMC6100521; doi:10.3390/molecules23061461), 2018-06-15
Supplement: molecules-23-01461-s001.pdf [file molecules-23-01461-s001.pdf]

**Figure S1.** Overview of aggregate samples from Chivasso at family level, taxa > 0.6% are shown.

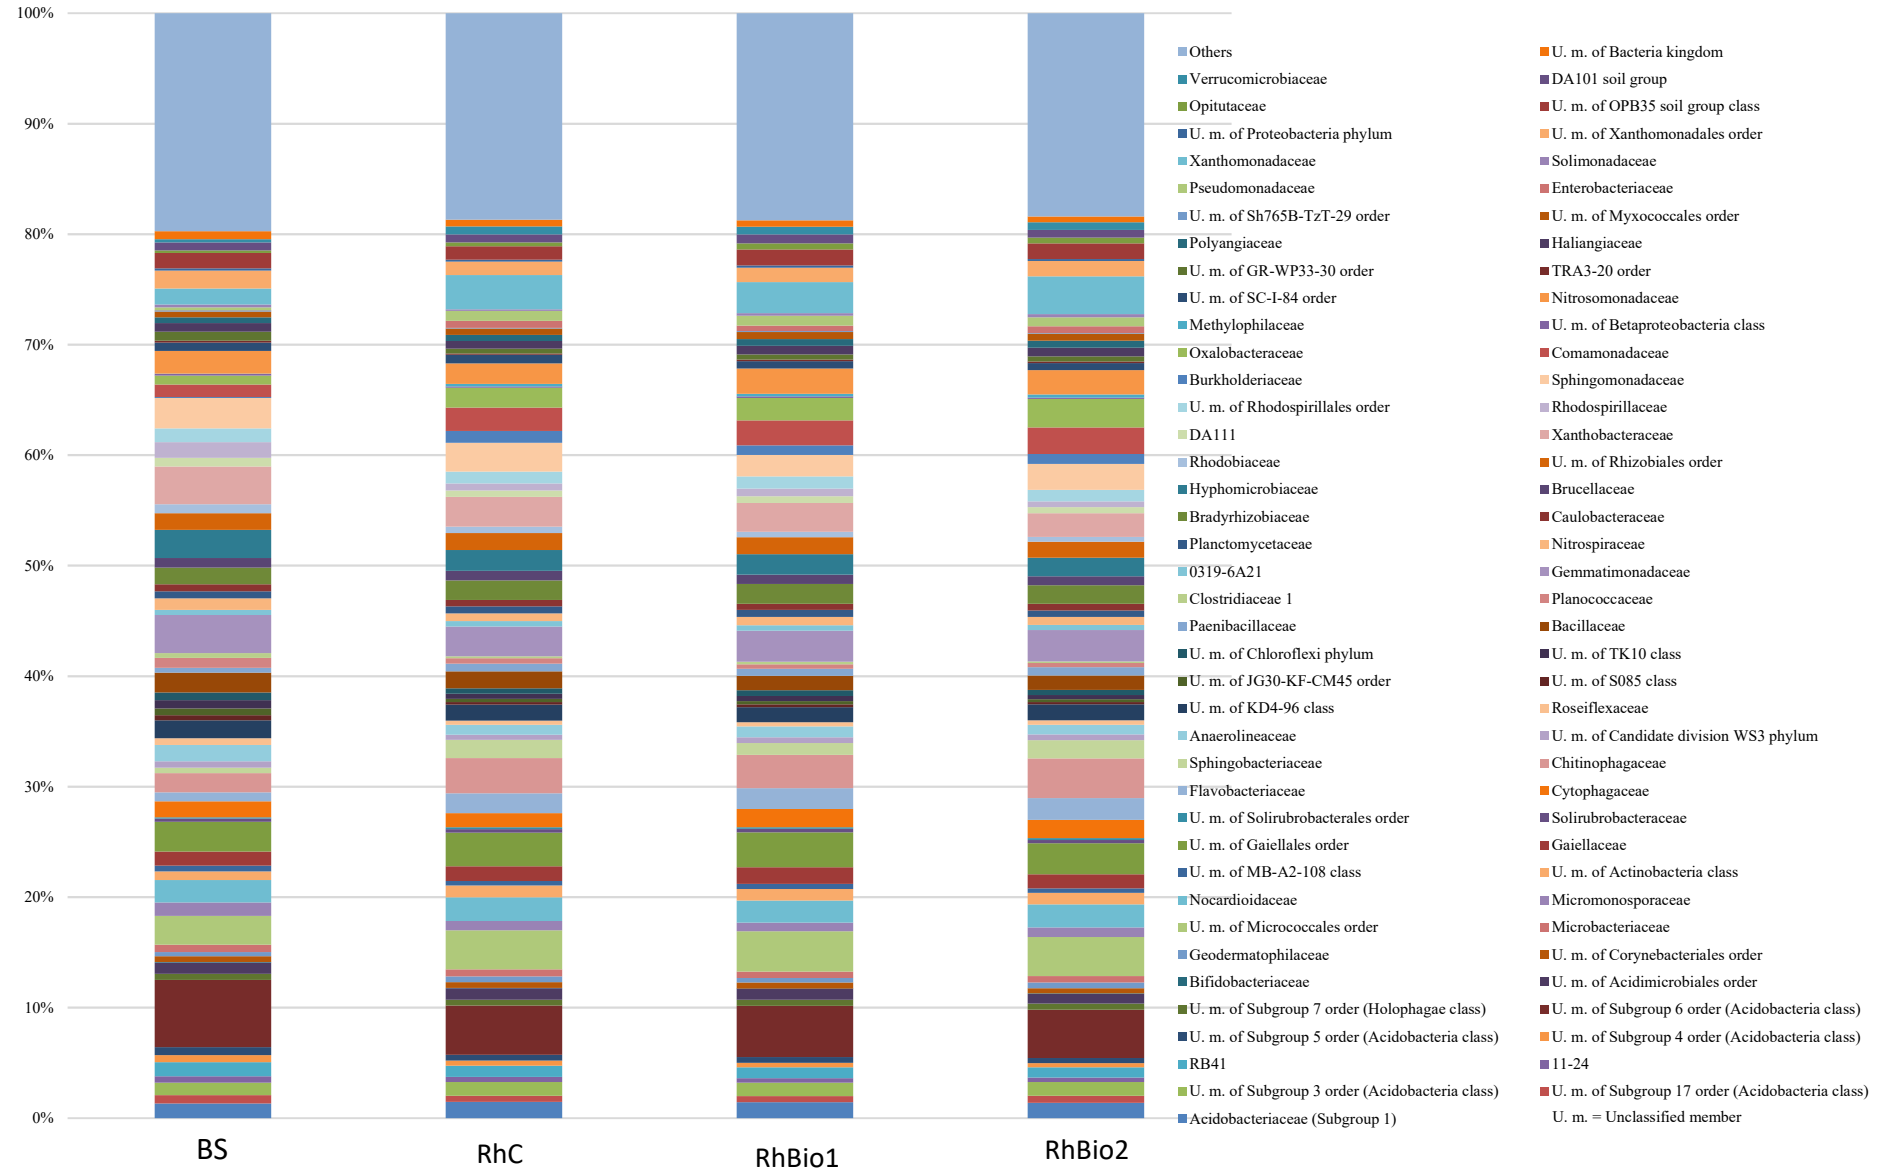

**Figure S2.** Overview of aggregate samples from Carignano at family level, taxa > 0.6% are shown.

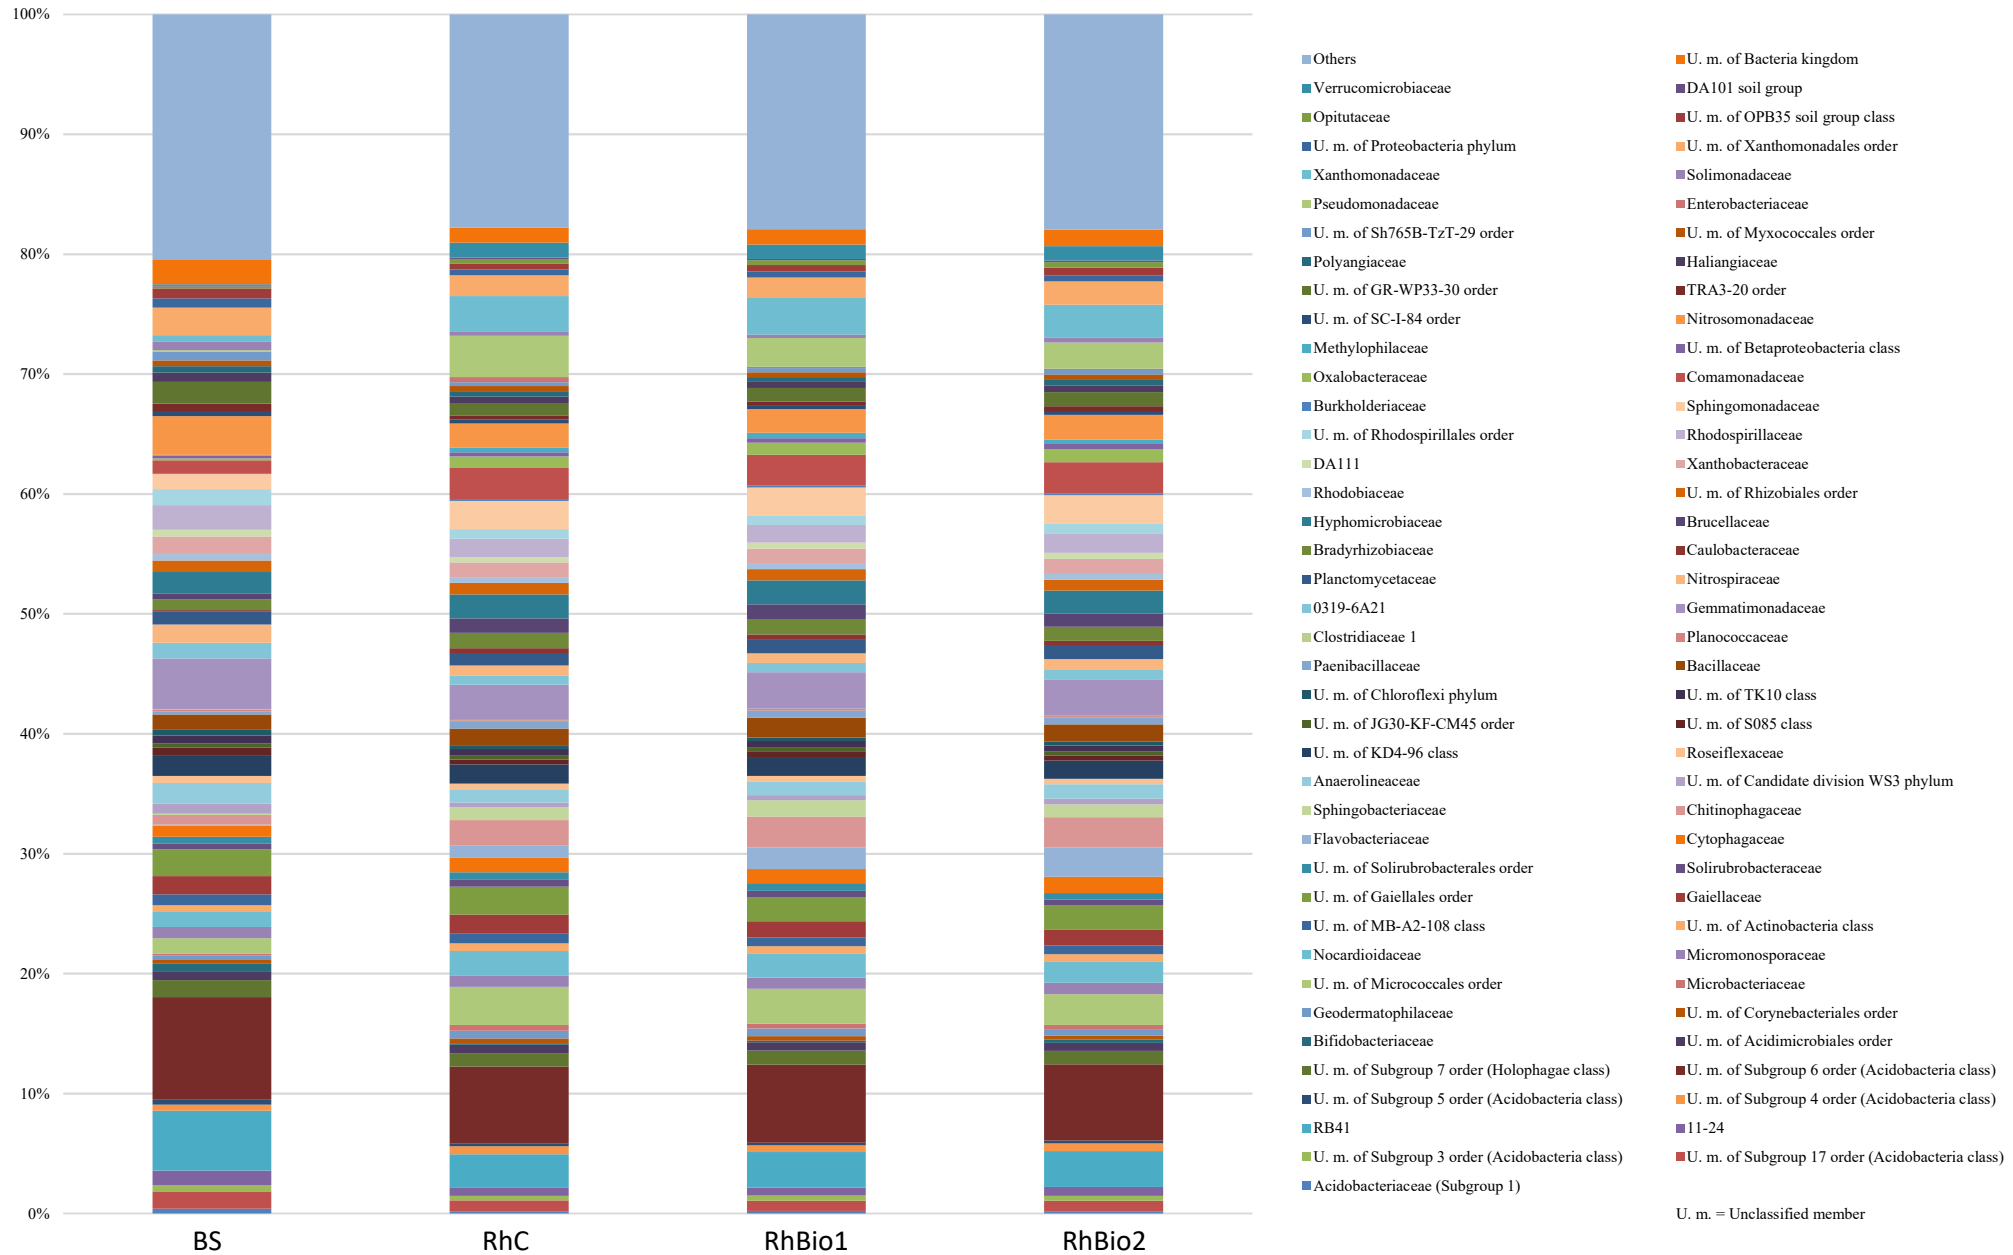

**Figure S3.** Overview of aggregate samples from Carignano at genus level, taxa>0.6% are shown.

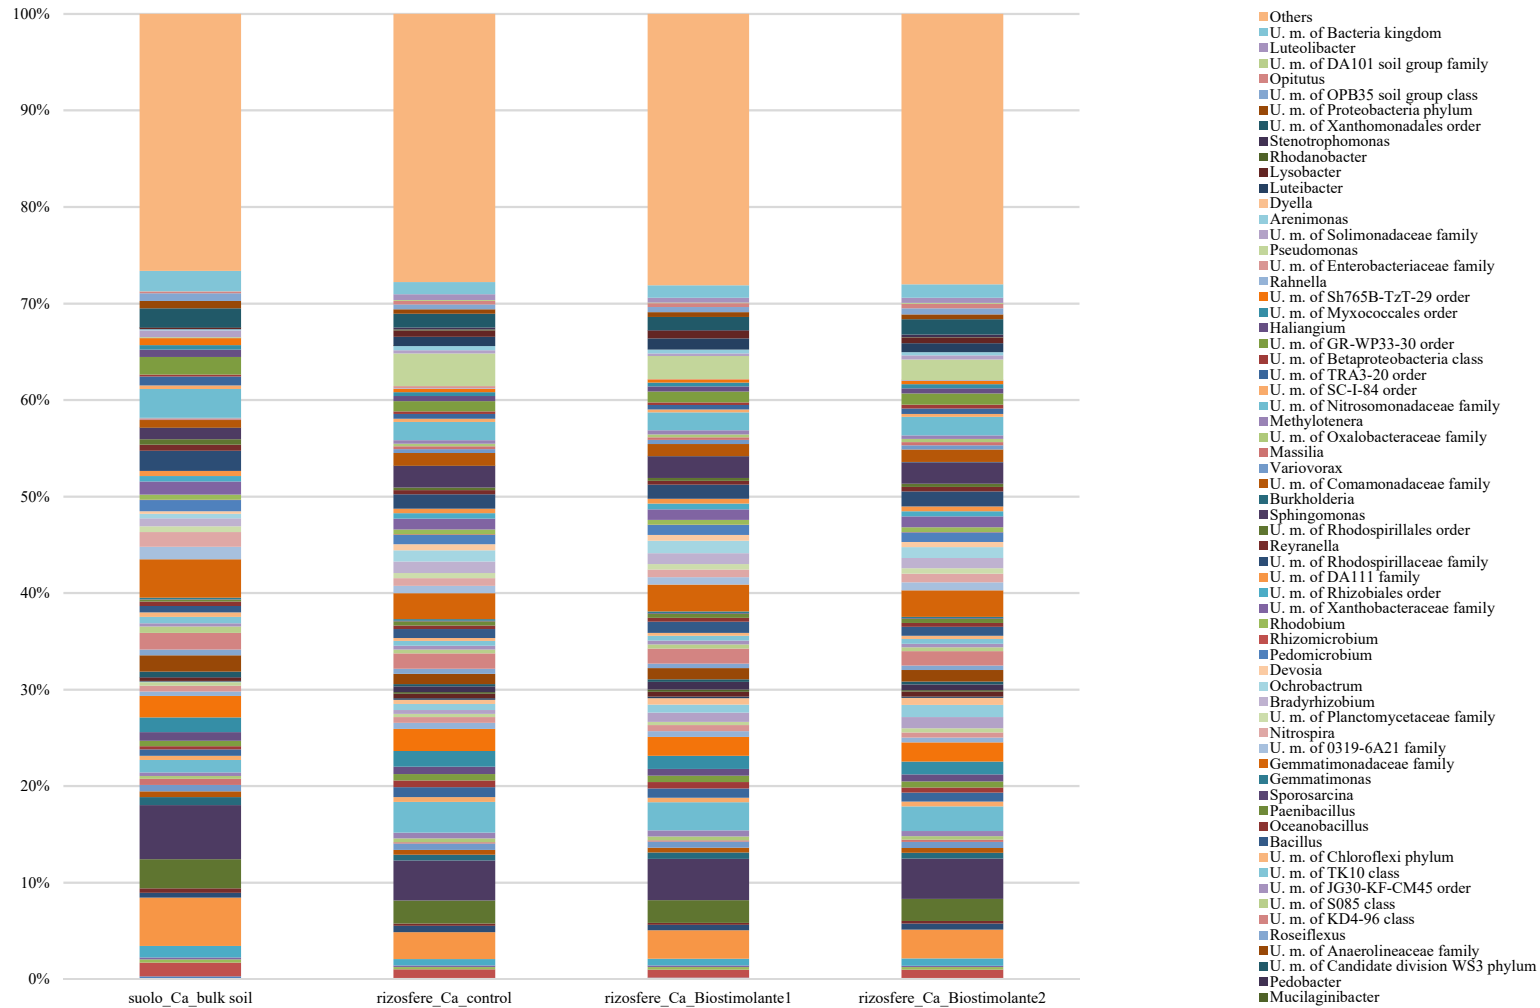

**Figure S4.** Overview of aggregate samples from Chivasso at genus level, taxa>0.6% are shown.

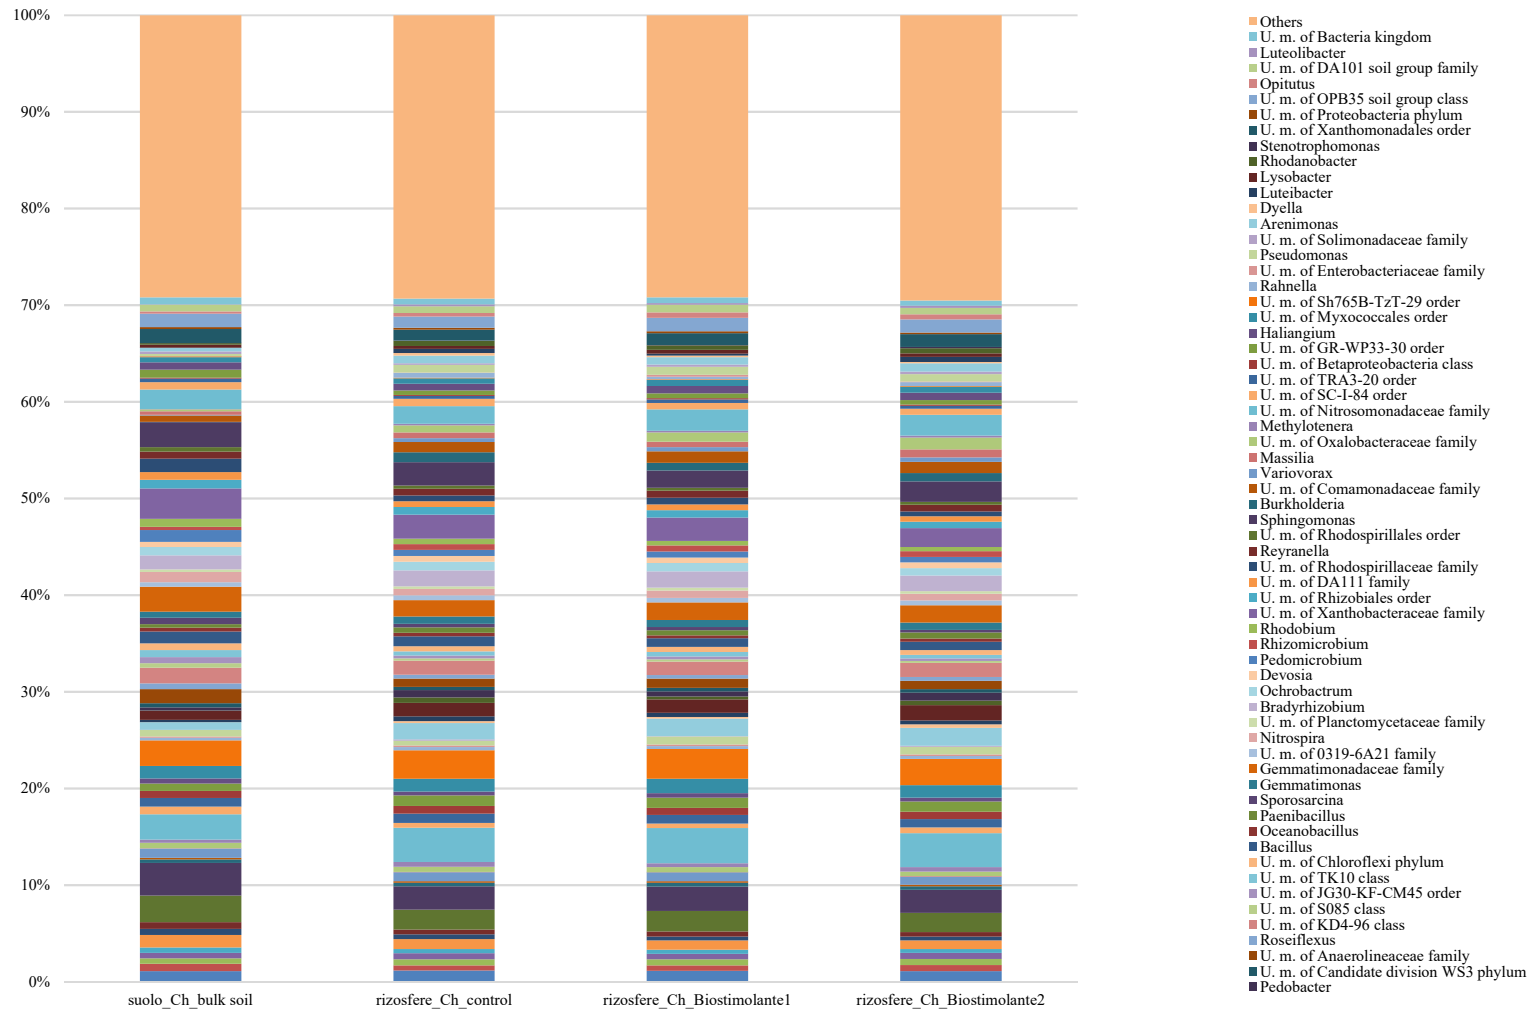

**Table S1:** Data filtering report of single sample runs. BS= bulk soil; Rh= rhizosphere; Ch=Chivasso site; Ca= Carignano site. Bio1=Biostimulant 1; Bio2= Biostimulant 2. Four biological samples were analysed for each treatment (named 1,2,3,4).

| Sample   | Number of sequenced pe reads | Number of pe reads with mean quality > 20 | Number of merged pe reads | Human sequences | Length outside bounds of 100 and 400 | Ambiguous bases | Homopolymers > 7 | Mismatch in primers >1 | Reverse primer not found | Final Read Number |
|----------|------------------------------|-------------------------------------------|---------------------------|-----------------|--------------------------------------|-----------------|------------------|------------------------|--------------------------|-------------------|
| BSCh1    | 75285                        | 71888                                     | 68837                     | 89              | 0                                    | 0               | 42               | 1607                   | 66                       | 67033             |
| BSCh2    | 72336                        | 71687                                     | 68856                     | 13              | 0                                    | 0               | 39               | 2268                   | 40                       | 66496             |
| BSCh3    | 66712                        | 66052                                     | 64378                     | 49              | 0                                    | 0               | 51               | 1998                   | 52                       | 62228             |
| BSCh4    | 71673                        | 70036                                     | 67176                     | 66              | 0                                    | 0               | 48               | 3051                   | 57                       | 63954             |
| RhCh1    | 61155                        | 59316                                     | 57760                     | 288             | 0                                    | 0               | 18               | 2292                   | 51                       | 55111             |
| RhCh2    | 72638                        | 70648                                     | 67787                     | 1064            | 0                                    | 0               | 19               | 1705                   | 53                       | 64946             |
| RhCh3    | 67095                        | 65028                                     | 62731                     | 398             | 0                                    | 0               | 18               | 1518                   | 43                       | 60754             |
| RhCh4    | 66256                        | 63213                                     | 60119                     | 457             | 0                                    | 0               | 35               | 2245                   | 45                       | 57337             |
| RhChBio1 | 68889                        | 66372                                     | 64080                     | 1595            | 0                                    | 0               | 31               | 1593                   | 47                       | 60814             |
| RhChBio1 | 62286                        | 60762                                     | 58872                     | 477             | 0                                    | 0               | 20               | 2471                   | 30                       | 55874             |
| RhChBio1 | 60056                        | 58018                                     | 56758                     | 161             | 0                                    | 0               | 33               | 1675                   | 45                       | 54844             |
| RhChBio1 | 67764                        | 64841                                     | 62504                     | 196             | 0                                    | 0               | 37               | 2874                   | 44                       | 59351             |
| RhChBio2 | 85535                        | 81384                                     | 79529                     | 1671            | 0                                    | 0               | 36               | 3145                   | 58                       | 74618             |
| RhChBio2 | 63430                        | 61830                                     | 59686                     | 914             | 0                                    | 0               | 31               | 1652                   | 43                       | 57046             |
| RhChBio2 | 58036                        | 57224                                     | 55568                     | 666             | 0                                    | 0               | 14               | 1441                   | 37                       | 53410             |
| RhChBio2 | 41970                        | 41631                                     | 39152                     | 157             | 0                                    | 0               | 14               | 3555                   | 99                       | 35327             |
| BSCa1    | 65185                        | 62840                                     | 60210                     | 46              | 0                                    | 0               | 89               | 1568                   | 57                       | 58450             |
| BSCa2    | 57969                        | 54958                                     | 52978                     | 33              | 0                                    | 0               | 82               | 2229                   | 34                       | 50600             |
| BSCa3    | 62278                        | 59565                                     | 57743                     | 65              | 0                                    | 0               | 90               | 1889                   | 61                       | 55638             |
| BSCa4    | 59343                        | 56737                                     | 54447                     | 30              | 0                                    | 0               | 70               | 2924                   | 51                       | 51372             |
| RhCa1    | 60645                        | 59074                                     | 57398                     | 393             | 0                                    | 0               | 85               | 2400                   | 76                       | 54443             |
| RhCa2    | 60684                        | 57910                                     | 55674                     | 1468            | 0                                    | 0               | 72               | 1544                   | 50                       | 52540             |
| RhCa3    | 58986                        | 56407                                     | 54322                     | 444             | 0                                    | 0               | 47               | 1453                   | 71                       | 52307             |
| RhCa4    | 58374                        | 56179                                     | 53672                     | 243             | 0                                    | 0               | 46               | 2226                   | 38                       | 51119             |
| RhCaBio1 | 65959                        | 63107                                     | 60687                     | 901             | 0                                    | 0               | 69               | 1512                   | 38                       | 58167             |
| RhCaBio1 | 66246                        | 64156                                     | 61822                     | 595             | 0                                    | 0               | 71               | 2403                   | 33                       | 58720             |
| RhCaBio1 | 65039                        | 62675                                     | 61074                     | 1024            | 0                                    | 0               | 82               | 1806                   | 40                       | 58122             |
| RhCaBio1 | 76430                        | 73249                                     | 70431                     | 1341            | 0                                    | 0               | 98               | 3102                   | 50                       | 65840             |
| RhCaBio2 | 70735                        | 68722                                     | 66978                     | 827             | 0                                    | 0               | 56               | 2633                   | 45                       | 63417             |
| RhCaBio2 | 60817                        | 59449                                     | 57041                     | 392             | 0                                    | 0               | 50               | 1564                   | 44                       | 54991             |
| RhCaBio2 | 65632                        | 63467                                     | 61367                     | 501             | 0                                    | 0               | 62               | 1490                   | 42                       | 59271             |
| RhCaBio2 | 51349                        | 50539                                     | 48135                     | 385             | 0                                    | 0               | 55               | 2292                   | 29                       | 45374             |

**Table S2.** List of significant abundant taxa at least with one Biostimulant in Chivasso and Carignano sites, and microorganisms characteristics.

**CHIVASSO SITE**

| <i>Taxa identified</i>       | <b>Characteristics</b>                            | <b>References</b>       |
|------------------------------|---------------------------------------------------|-------------------------|
| <i>Opitutus genus</i>        | N-cycling                                         | Van Passel et al., 2011 |
| <i>Nannocystis genus</i>     | Antimicrobial activity and siderophore production | Taylor et al 2001       |
| <i>U.m. PHOS-HE51 family</i> | N-cycling                                         | Dabert et al., 2001     |
| <i>Cytophagaceae family</i>  | N cycling                                         | McBride et al., 2014    |
| <i>Chryseolinea genus</i>    | N-cycling                                         | Kim et al., 2013        |
| <i>Niastella genus</i>       | IAA production, P solubilisation                  | Chen et al., 2016       |
| <i>Terrimonas genus</i>      | N cycling                                         | Jin et al., 2103        |
| <i>Solimonadaceae family</i> | Antimicrobial activity                            | Zhou et al., 2014       |
| <i>Rhodovastum</i>           | N cycling                                         | Okamura et al., 2009    |

**CARIGNANO SITE**

| <i>Taxa identified</i>               | <b>Characteristics</b>                                    | <b>References</b>    |
|--------------------------------------|-----------------------------------------------------------|----------------------|
| <i>Anaeromyxobacter dehalogenans</i> | N cycling                                                 | Sanford et al., 2002 |
| <i>Deltaproteobacteria</i>           | Sulfur-reducing bacteria. Plant growth promoting bacteria | Spain et al., 2009   |
| <b>Planctomycete LX80</b>            | N cycling                                                 | Uniprot              |

|                                      |                                                 |                             |
|--------------------------------------|-------------------------------------------------|-----------------------------|
| <i>Actinoallomurus</i>               | PGPR, Phytohormon production                    | Tang et al., 2013           |
| <i>Chitinophagaceae family</i>       | PGPR, IAA ACCdeaminase activity, P solubilisers | Rosenberg, 2014             |
| <i>Chloroflexia</i>                  | PGPR, Phytohormon production                    | Pepe-Rnney et al., 2016     |
| <i>Anaerobacillus</i>                | Diazotrophic N cycling                          | Borsodi et al., 2015        |
| <i>Cohnella</i>                      | Endophyte, N cycling                            | García-Fraile et al., 2008  |
| <i>Isosphaera</i>                    | Phytohormon production                          | Wang et al., 2002           |
| <i>Nannocystis</i>                   | Antimicrobial activity                          | Taylor et al 2001           |
| <i>Quadrisphaera</i>                 | Antimicrobial activity                          | Maszenan et al., 2005       |
| <i>Ohtaekwangia</i>                  | Antimicrobial activity                          | Correa-Galeote et al., 2016 |
| <i>Anaerolinaceae family</i>         | Antimicrobial activity                          | Nguyen et al., 2016         |
| <i>Thermoactinomicetaceae family</i> | Antimicrobial activity                          |                             |
| <i>Labrys</i>                        | PGPR. Phytohormon production                    | Carvalho et al., 2008       |
| <i>Thermomonas</i>                   | N cycling                                       | Wang et al., 2014           |
| <i>Turneriella</i>                   | Antimicrobial activity                          | O'Mahony et al., 2015       |
| <i>Pseudoduganella</i>               | N-cycling                                       | Madhaiyan et al., 2013      |

- Borsodi, A.K., Bárány, Á., Krett, G., Márialigeti, K., Szili-Kovács, T., 2015. Diversity and ecological tolerance of bacteria isolated from the rhizosphere of halophyton plants living nearby Kiskunság soda ponds, Hungary. *Acta Microbiologica and Immunologica Hungarica*. 62:183-97. doi: 10.1556/030.62.2015.2.8.
- Carvalho, M.F., De Marco, P., Duque, A.F., Pacheco, C.C., Janssen, D.B., Castro, P.M., 2008. *Labrys portucalensis* sp. nov., a fluorobenzene-degrading bacterium isolated from an industrially contaminated sediment in northern Portugal. *International Journal of Systematic and Evolutionary Microbiology*, 58:692-698. doi: 10.1099/ijs.0.65472-0.
- Chen, L., Wang, D., Yang, S., Wang, G., 2016. *Niastella vici* sp. nov., isolated from farmland soil. *International Journal of Systematic and Evolutionary Microbiology*, 66:1768-72. doi: 10.1099/ijsem.0.000943.
- Correa-Galeote, D., Eulogio, J., Bedmar, E.J., Fernández-González, A.J., Fernández-López, M., Gregorio, J., Arone, G.J., 2016 Bacterial communities in the rhizosphere of amilaceous maize (*Zea mays* L.) as assessed by pyrosequencing. *Frontiers in Plant Science* 7: 1016.
- Dabert, P., Sialve, B., Delgenès, J.P., Moletta R., Godon J-J 2001. Characterisation of the microbial 16S rDNA diversity of an aerobic phosphorus-removal ecosystem and monitoring of its transition to nitrate respiration *Applied Microbiology and Biotechnology* 55: 500. doi:10.1007/s002530000529
- García-Fraile, P., Velázquez, E., Mateos, P.F., Martínez-Molina, E., Rivas, R., 2008. *Cohnella phaseoli* sp. nov., isolated from root nodules of *Phaseolus coccineus* in Spain, and emended description of the genus *Cohnella*. *International Journal of Systematic and Evolutionary Microbiology* 58:1855-9. doi: 10.1099/ijs.0.65468-0.
- Jin, D., Wang, P., Bai, Z., Jin, B., Yu, Z., Wang, X., Zhuang, G., Zhang, H., 2013. *Terrimonas pekingensis* sp. nov., isolated from bulking sludge, and emended descriptions of the genus *Terrimonas*, *Terrimonas ferruginea*, *Terrimonas lutea* and *Terrimonas aquatica*. *International Journal of Systematic and Evolutionary Microbiology* 63:1658-64. doi: 10.1099/ijs.0.036848-0.
- Kim, J.J., Alkawally, M., Brady, A.L., Rijpstra, W.I., Sinninghe Damsté, J.S., Dunfield, P.F., 2013. *Chryseolinea serpens* gen. nov., sp. nov., a member of the phylum *Bacteroidetes* isolated from soil. *International Journal of Systematic and Evolutionary Microbiology* 63:654-60. doi: 10.1099/ijs.0.039404-0.
- Madhaiyan, M., Poonguzhali, S., Saravanan, V.S., Hari, K., Lee, K.C., Lee, J.S., 2013. *Duganella sacchari* sp. nov. and *Duganella radialis* sp. nov., two novel species isolated from rhizosphere of field-grown sugar cane. *International Journal of Systematic and Evolutionary Microbiology* 63:1126-31.



- Maszenan, A.M., Tay, J-H., Schumann, P., Jiang, H-L., Tay, T-L. S., 2005 *Quadrisphaera granulorum* gen. nov., sp. nov., a Gram-positive polyphosphate-accumulating coccus in tetrads or aggregates isolated from aerobic granules International Journal of Systematic and Evolutionary Microbiology 55, 1771–1777
- Nguyen, N.L., Kim, Y.J., Hoang, V.A., Subramaniam, S., Kang, J.P., Kang, C.H., Yang, D.C., 2016. Bacterial diversity and community structure in Korean ginseng field soil are shifted by cultivation time. PLoS One.11(5):e0155055. doi: 10.1371/journal.pone.0155055.
- O'Mahony, M.M., Henneberger, R., Selvin, J., Kennedy, J., Doohan, F., Julian, R., Marchesi, J.R., Dobson, A.D.W., 2015. Inhibition of the growth of *Bacillus subtilis* DSM10 by a newly discovered antibacterial protein from the soil metagenome Bioengineered. 6: 89–98.
- Okamura, K., Hisada, T., Kanbe, T., Hiraishi, A., 2009. *Rhodovastum atsumiense* gen. nov., sp. nov., a phototrophic alphaproteobacterium isolated from paddy soil. Journal of Genetic and Applied Microbiology.55:43-50.
- Sanford, R.A., Cole, J.R., Tiedje, J.M., 2002. Characterization and description of *Anaeromyxobacter dehalogenans* gen. nov., sp. nov., an aryl-halorespiring facultative anaerobic myxobacterium. Applied and Environmental Microbiology,. 68:893-900.
- Spain, A.M., Krumholz, L.R., Elshahed, M.S., 2009. Abundance, composition, diversity and novelty of soil *Proteobacteria* The ISME Journal 3, 992–1000; doi:10.1038/ismej.2009.43
- Tang, Y.L., Lin, H.P., Xie, Q.Y., Li L., Peng, F., Deng, Z. Hong, K., 2013. *Actinoallomurus acanthiterrae* sp. nov., an actinomycete isolated from rhizosphere soil of the mangrove plant *Acanthus ilicifolius*. International Journal of Systematic and Evolutionary Microbiology 63, 1874-1879.
- Wang D.I., Wang, L., Wang, G., 2014. *Thermomonas carbonis* sp. nov., isolated from the soil of a coal mine International Journal of Systematic and Evolutionary Microbiology 64, 3631–3635
- Wang J, Jenkins C, Webb RI, Fuerst JA 2002. Isolation of *Gemmata*-Like and *Isosphaera*-Like Planctomycete bacteria from soil and freshwater. Applied and Environmental Microbiology, 68: 417–422.
